# Supplementary material for: Fish predation hinders the success of coral restoration efforts using fragmented massive corals
Source: PeerJ. 2020 Oct 2;8:e9978. doi: 10.7717/peerj.9978 (PMC7534677; doi:10.7717/peerj.9978)
Supplement: Supplemental Information 4 — Raw data [file peerj-08-9978-s004.xlsx]

## Sheet: reef fish
reef	survey	N of predatory fish
Reef 1	1	25
Reef 1	2	40
Reef 1	3	62
Reef 1	4	37
Reef 1	5	88
Reef 1	6	52
Reef 1	7	66
Reef 1	8	37
Reef 1	9	114
Reef 1	10	75
Reef 1	11	52
Reef 1	12	44
Reef 1	13	62
Reef 2	1	46
Reef 2	2	36
Reef 2	3	47
Reef 2	4	46
Reef 2	5	50
Reef 2	6	51
Reef 2	7	32
Reef 2	8	42
Reef 2	9	39
Reef 2	10	45
Reef 3	1	12
Reef 3	2	12
Reef 3	3	16
Reef 3	4	10
Reef 3	5	11
Reef 3	6	15
Reef 3	7	18
Reef 3	8	19
Reef 3	9	8
Reef 3	10	7
Reef 3	11	3
Reef 3	12	22
Reef 3	13	3
Reef 3	14	15

## Sheet: exp 2
treatment	% tissue removed
Exposed	15
Exposed	6.66667
Exposed	6.66667
Exposed	3
Exposed	8.33333
Exposed	3.33333
Exposed	5.33333
Exposed	20
Exposed	10
Exposed	52.5
Flushed	0.333333
Flushed	2
Flushed	0
Flushed	19
Flushed	11
Flushed	0.333333
Flushed	4
Flushed	1.66667
Flushed	0
Flushed	1.66667
Fused	0
Fused	0.333333
Fused	0
Fused	6.66667
Fused	5
Fused	3.33333
Fused	7.33333
Fused	8.66667
Fused	0
Fused	0
Healed	0
Healed	31.6667
Healed	0.333333
Healed	5
Healed	0
Healed	0
Healed	1.66667
Healed	2
Healed	18.3333
Healed	0
Submerged	0
Submerged	0.666667
Submerged	0
Submerged	0
Submerged	0
Submerged	0
Submerged	0
Submerged	0
Submerged	0
Submerged	1.66667

## Sheet: exp 1
SPP	Treatment	Reef	N corals	MEAN SIZE (AT OUTPLANT)	SD SIZE (INITIAL)	MAX SIZE (INITIAL)	MEAN SIZE (AT 6 MONTHS)	SD SIZE (6 MONTHS)	MAX SIZE (6 MONTHS)	% CORALS REMOVED 1 WEEK	% REMOVED 1 MONTH	% REMOVED 3 MO	% REMOVED 6 MO	% OF REMAINING CORALS WITH BITES 1 WEEK	% WITH BITES 1 MO	% WITH BITES 3 MO	% WITH BITES 6 MO	% CORALS REMAINING 100% DEAD @1 WEEK	% CORALS REMAINING 100% DEAD @1 MO	% CORALS REMAINING 100% DEAD @3 MO	% CORALS REMAINING 100% DEAD @6 MO	% OF CORALS LOST (MISSING AND DEAD) AT 6 MONTHS
Mcav	plug	1	NA	NA	NA	NA	NA	NA	NA	NA	NA	NA	NA	NA	NA	NA	NA	NA	NA	NA	NA	NA
Mcav	puck	1	36	4.65936	1.34245	7.004	6.94523	1.81662	12.618	0.0555556	0.0555556		0.111111	0	0		0	0.117647	0.117647		0.125	0.236111
Mcav	plug	2	22	3.14923	0.99603	4.899	2.4616	0.621065	3.158	0	0		0.0454545	0	0		0	0	0.590909		0.714286	0.75974
Mcav	puck	2	10	5.0932	0.923498	6.404	3.75933	3.18916	7.186	0.1	0.1		0.1	0	0		0	0.111111	0.444444		0.666667	0.766667
Mcav	plug	3	NA	NA	NA	NA	NA	NA	NA	NA	NA	NA	NA	NA	NA	NA	NA	NA	NA	NA	NA	NA
Mcav	puck	3	11	5.23264	1.16582	7.375	9.90044	3.43672	14.407	0.0909091	0.0909091		0.181818	0	0.1		0	0	0		0	0.181818
Ofav	plug	1	8	4.29338	0.656256	5.455	3.0845	0.50841	3.444	0	0.25		0.375	0	0		0	0	0		0.6	0.975
Ofav	puck	1	43	3.47773	1.58286	7.686	5.30412	1.88662	9.314	0.0930233	0.0930233		0.27907	0.333333	0.025641		0.0322581	0	0.0512821		0.16129	0.44036
Ofav	plug	2	29	3.15803	1.91589	9.852	4.43467	2.0759	7.836	0.172414	0.172414		0.275862	0	0.0833333		0	0.166667	0.166667		0.571429	0.847291
Ofav	puck	2	65	3.21591	1.38147	10.282	6.874	5.86615	23.094	0.138462	0.138462		0.2	0.0178571	0.0714286		0	0.0892857	0.0892857		0.788462	0.988462
Ofav	plug	3	NA	NA	NA	NA	NA	NA	NA	NA	NA	NA	NA	NA	NA	NA	NA	NA	NA	NA	NA	NA
Ofav	puck	3	17	3.84018	1.09018	5.744	6.474	2.60945	11.569	0.117647	0.117647		0.117647	0	0		0	0.0666667	0.0666667		0.2	0.317647
Pcliv	plug	1	12	4.2445	2.40377	10.282	5.58711	2.71939	9.713	0.0833333	0.0833333		0.25	0.0909091	0.0909091		0	0	0		0	0.25
Pcliv	puck	1	43	4.2246	1.95509	9.681	7.05971	3.17384	13.333	0.209302	0.209302		0.232558	0.0588235	0.0294118		0.030303	0.0294118	0.0588235		0.0606061	0.293164
Pcliv	plug	2	9	3.80311	1.07856	5.419	0	0	0	0.333333	0.555556		0.666667	0.666667	0		0	0.333333	0.5		1	1.66667
Pcliv	puck	2	35	5.49497	2.61835	11.808	9.79846	6.46306	24.871	0.485714	0.485714		0.571429	0.166667	0		0	0.111111	0.111111		0.133333	0.704762
Pcliv	plug	3	NA	NA	NA	NA	NA	NA	NA	NA	NA	NA	NA	NA	NA	NA	NA	NA	NA	NA	NA	NA
Pcliv	puck	3	10	5.3306	1.9446	8.929	9.53556	2.54123	14.728	0	0		0.1	0	0		0	0	0		0	0.1
Pstri	plug	1	12	4.51683	2.19293	7.623	3.46775	1.21382	5.274	0.5	0.583333		0.666667	0.333333	0		0	0	0		0	0.666667
Pstri	puck	1	25	3.9381	1.60708	7.202	3.96375	1.26916	5.306	0.44	0.44		0.52	0.285714	0		0	0.142857	0.214286		0.333333	0.853333
Pstri	plug	2	20	NA	NA	NA	3.6465	2.11116	7.153	0.45	0.65		0.65	0	0.285714		0	0	0.142857		0.142857	0.792857
Pstri	puck	2	15	5.0746	3.97686	11.124	8.589	6.71893	13.34	0.333333	0.333333		0.4	0.2	0		0	0.5	0.6		0.777778	1.17778
Pstri	plug	3	NA	NA	NA	NA	NA	NA	NA	NA	NA	NA	NA	NA	NA	NA	NA	NA	NA	NA	NA	NA
Pstri	puck	3	5	5.5606	0.852762	6.975	9.955	2.63043	14.05	0	0		0	0	0		0	0	0		0	0

## Sheet: surv exp 1
Species	Status 1 Week	Status 1 month	Status 6 month
PSTR	Dead	Dead	Dead
PSTR	Dead	Dead	Dead
PSTR	Dead	Dead	Dead
PSTR	Dead	Dead	Dead
PSTR	Dead	Dead	Dead
PSTR	Dead	Dead	Dead
PSTR	Dead	Dead	Dead
MCAV	Dead	Dead	Dead
OFAV	Dead	Dead	Dead
OFAV	Dead	Dead	Dead
MCAV	Dead	Dead	Dead
MCAV	Dead	Dead	Dead
OFAV	Dead	Dead	Dead
OFAV	Alive	Dead	Dead
OFAV	Alive	Dead	Dead
PSTR	Alive	Dead	Dead
OFAV	Alive	Dead	Dead
PCLI	Alive	Dead	Dead
PSTR	Alive	Dead	Dead
MCAV	Alive	Dead	Dead
MCAV	Alive	Dead	Dead
MCAV	Alive	Dead	Dead
OFAV	Alive	Alive	Dead
PSTR	Alive	Alive	Dead
PSTR	Alive	Alive	Dead
OFAV	Alive	Alive	Dead
OFAV	Alive	Alive	Dead
OFAV	Alive	Alive	Dead
OFAV	Alive	Alive	Dead
OFAV	Alive	Alive	Dead
OFAV	Alive	Alive	Dead
OFAV	Alive	Alive	Dead
OFAV	Alive	Alive	Dead
OFAV	Alive	Alive	Dead
OFAV	Alive	Alive	Dead
OFAV	Alive	Alive	Dead
OFAV	Alive	Alive	Dead
OFAV	Alive	Alive	Dead
OFAV	Alive	Alive	Dead
OFAV	Alive	Alive	Dead
OFAV	Alive	Alive	Dead
OFAV	Alive	Alive	Dead
OFAV	Alive	Alive	Dead
OFAV	Alive	Alive	Dead
OFAV	Alive	Alive	Dead
OFAV	Alive	Alive	Dead
OFAV	Alive	Alive	Dead
OFAV	Alive	Alive	Dead
OFAV	Alive	Alive	Dead
OFAV	Alive	Alive	Dead
OFAV	Alive	Alive	Dead
OFAV	Alive	Alive	Dead
PCLI	Alive	Alive	Dead
OFAV	Alive	Alive	Dead
OFAV	Alive	Alive	Dead
OFAV	Alive	Alive	Dead
OFAV	Alive	Alive	Dead
PCLI	Missing	Missing	Dead
OFAV	Missing	Missing	Dead
MCAV	Missing	Missing	Dead
OFAV	Alive	Alive	Dead
MCAV	Alive	Alive	Dead
MCAV	Alive	Alive	Dead
OFAV	Alive	Alive	Dead
OFAV	Alive	Alive	Dead
OFAV	Alive	Alive	Dead
OFAV	Alive	Alive	Dead
OFAV	Alive	Alive	Dead
OFAV	Alive	Alive	Dead
OFAV	Alive	Alive	Dead
OFAV	Alive	Alive	Dead
OFAV	Alive	Alive	Dead
OFAV	Alive	Alive	Dead
OFAV	Alive	Alive	Alive
OFAV	Alive	Alive	Alive
PCLI	Alive	Alive	Alive
PCLI	Alive	Alive	Alive
PCLI	Alive	Alive	Alive
OFAV	Alive	Alive	Alive
OFAV	Alive	Alive	Alive
OFAV	Alive	Alive	Alive
PCLI	Alive	Alive	Alive
OFAV	Alive	Alive	Alive
OFAV	Alive	Alive	Alive
OFAV	Alive	Alive	Alive
OFAV	Alive	Alive	Alive
PSTR	Alive	Alive	Alive
OFAV	Alive	Alive	Alive
OFAV	Alive	Alive	Alive
OFAV	Alive	Alive	Alive
OFAV	Alive	Alive	Alive
PCLI	Alive	Alive	Alive
OFAV	Alive	Alive	Alive
PCLI	Alive	Alive	Alive
PSTR	Alive	Alive	Alive
OFAV	Alive	Alive	Alive
OFAV	Alive	Alive	Alive
OFAV	Alive	Alive	Alive
OFAV	Alive	Alive	Alive
OFAV	Alive	Alive	Alive
MCAV	Alive	Alive	Alive
MCAV	Alive	Alive	Alive
MCAV	Alive	Alive	Alive
MCAV	Alive	Alive	Alive
MCAV	Alive	Alive	Alive
MCAV	Alive	Alive	Alive
MCAV	Alive	Alive	Alive
MCAV	Alive	Alive	Alive
MCAV	Alive	Alive	Alive
MCAV	Alive	Alive	Alive
MCAV	Alive	Alive	Alive
MCAV	Alive	Alive	Alive
MCAV	Alive	Alive	Alive
MCAV	Alive	Alive	Alive
MCAV	Alive	Alive	Alive
MCAV	Alive	Alive	Alive
MCAV	Alive	Alive	Alive
MCAV	Alive	Alive	Alive
MCAV	Alive	Alive	Alive
MCAV	Alive	Alive	Alive
MCAV	Alive	Alive	Alive
MCAV	Alive	Alive	Alive
MCAV	Alive	Alive	Alive
MCAV	Alive	Alive	Alive
PCLI	Alive	Alive	Alive
PCLI	Alive	Alive	Alive
PCLI	Alive	Alive	Alive
PCLI	Alive	Alive	Alive
MCAV	Alive	Alive	Alive
PCLI	Alive	Alive	Alive
MCAV	Alive	Alive	Alive
PCLI	Alive	Alive	Alive
PCLI	Alive	Alive	Alive
OFAV	Alive	Alive	Alive
MCAV	Alive	Alive	Alive
PSTR	Alive	Alive	Alive
PSTR	Alive	Alive	Alive
PCLI	Alive	Alive	Alive
PSTR	Alive	Alive	Alive
PSTR	Alive	Alive	Alive
PCLI	Alive	Alive	Alive
PCLI	Alive	Alive	Alive
OFAV	Alive	Alive	Alive
PSTR	Alive	Alive	Alive
MCAV	Alive	Alive	Alive
PCLI	Alive	Alive	Alive
MCAV	Alive	Alive	Alive
MCAV	Alive	Alive	Alive
OFAV	Alive	Alive	Alive
MCAV	Alive	Alive	Alive
MCAV	Alive	Alive	Alive
PCLI	Alive	Alive	Alive
PCLI	Alive	Alive	Alive
PCLI	Alive	Alive	Alive
OFAV	Alive	Alive	Alive
PSTR	Alive	Alive	Alive
PCLI	Alive	Alive	Alive
PCLI	Alive	Alive	Alive
OFAV	Alive	Alive	Alive
PCLI	Alive	Alive	Alive
OFAV	Alive	Alive	Alive
OFAV	Alive	Alive	Alive
OFAV	Alive	Alive	Alive
OFAV	Alive	Alive	Alive
PCLI	Alive	Alive	Alive
PCLI	Alive	Alive	Alive
OFAV	Alive	Alive	Alive
PCLI	Alive	Alive	Alive
PCLI	Alive	Alive	Alive
PSTR	Alive	Alive	Alive
PCLI	Alive	Alive	Alive
PCLI	Alive	Alive	Alive
MCAV	Alive	Alive	Alive
PCLI	Dead	Dead	Missing
OFAV	Dead	Dead	Missing
OFAV	Dead	Dead	Missing
OFAV	Dead	Dead	Missing
MCAV	Dead	Dead	Missing
MCAV	Dead	Dead	Missing
PCLI	Dead	Dead	Missing
PCLI	Dead	Dead	Missing
OFAV	Alive	Alive	Missing
OFAV	Alive	Alive	Missing
OFAV	Alive	Alive	Missing
OFAV	Alive	Alive	Missing
PSTR	Alive	Alive	Missing
PCLI	Alive	Alive	Missing
MCAV	Alive	Alive	Missing
OFAV	Alive	Alive	Missing
OFAV	Alive	Alive	Missing
PCLI	Missing	Missing	Missing
PCLI	Missing	Missing	Missing
PSTR	Missing	Missing	Missing
PCLI	Missing	Missing	Missing
PSTR	Missing	Missing	Missing
PSTR	Missing	Missing	Missing
PSTR	Missing	Missing	Missing
PSTR	Missing	Missing	Missing
PSTR	Missing	Missing	Missing
PCLI	Missing	Missing	Missing
PSTR	Missing	Missing	Missing
PSTR	Missing	Missing	Missing
PSTR	Missing	Missing	Missing
PSTR	Missing	Missing	Missing
PCLI	Missing	Missing	Missing
PCLI	Missing	Missing	Missing
OFAV	Missing	Missing	Missing
OFAV	Missing	Missing	Missing
PCLI	Missing	Missing	Missing
OFAV	Missing	Missing	Missing
OFAV	Missing	Missing	Missing
PCLI	Missing	Missing	Missing
PCLI	Missing	Missing	Missing
PCLI	Missing	Missing	Missing
PCLI	Missing	Missing	Missing
PCLI	Missing	Missing	Missing
PCLI	Missing	Missing	Missing
PSTR	Missing	Missing	Missing
PSTR	Missing	Missing	Missing
PSTR	Missing	Missing	Missing
PSTR	Missing	Missing	Missing
PSTR	Missing	Missing	Missing
MCAV	Missing	Missing	Missing
OFAV	Missing	Missing	Missing
OFAV	Missing	Missing	Missing
OFAV	Missing	Missing	Missing
OFAV	Missing	Missing	Missing
OFAV	Missing	Missing	Missing
OFAV	Missing	Missing	Missing
OFAV	Missing	Missing	Missing
OFAV	Missing	Missing	Missing
OFAV	Missing	Missing	Missing
MCAV	Missing	Missing	Missing
MCAV	Missing	Missing	Missing
PCLI	Missing	Missing	Missing
PCLI	Missing	Missing	Missing
PCLI	Missing	Missing	Missing
PCLI	Missing	Missing	Missing
PCLI	Missing	Missing	Missing
PCLI	Missing	Missing	Missing
PCLI	Missing	Missing	Missing
PCLI	Missing	Missing	Missing
PCLI	Missing	Missing	Missing
PCLI	Missing	Missing	Missing
OFAV	Missing	Missing	Missing
PSTR	Alive	Missing	Missing
OFAV	Alive	Alive	Missing
OFAV	Alive	Alive	Missing
PSTR	Alive	Alive	Missing
PSTR	Alive	Alive	Missing
OFAV	Alive	Alive	Missing
PCLI	Alive	Alive	Missing
PCLI	Alive	Alive	Missing
PSTR	Alive	Alive	Alive
PCLI	Alive	Alive	Alive
OFAV	Alive	Alive	Alive
PCLI	Alive	Alive	Alive
OFAV	Alive	Alive	Alive
OFAV	Alive	Alive	Alive
OFAV	Alive	Alive	Alive
OFAV	Alive	Alive	Alive
OFAV	Alive	Alive	Alive
OFAV	Alive	Alive	Alive
OFAV	Alive	Alive	Alive
MCAV	Alive	Alive	Alive
OFAV	Alive	Alive	Alive
OFAV	Alive	Alive	Alive
OFAV	Alive	Alive	Alive
OFAV	Alive	Alive	Alive
PCLI	Alive	Alive	Alive
OFAV	Alive	Alive	Alive
PCLI	Alive	Alive	Alive
OFAV	Alive	Alive	Alive
OFAV	Alive	Alive	Alive
PCLI	Alive	Alive	Alive
PCLI	Alive	Alive	Alive
PCLI	Alive	Alive	Alive
PCLI	Alive	Alive	Alive
MCAV	Alive	Alive	Alive
OFAV	Alive	Alive	Alive
PCLI	Alive	Alive	Alive
PCLI	Alive	Alive	Alive
PCLI	Alive	Alive	Alive
PCLI	Alive	Alive	Alive
PCLI	Alive	Alive	Alive
PCLI	Alive	Alive	Alive
PCLI	Alive	Alive	Alive
PSTR	Alive	Alive	Alive
PCLI	Alive	Alive	Alive
MCAV	Alive	Alive	Alive
MCAV	Alive	Alive	Alive
OFAV	Alive	Alive	Alive
MCAV	Alive	Alive	Alive
MCAV	Alive	Alive	Alive
MCAV	Alive	Alive	Alive
MCAV	Alive	Alive	Alive
MCAV	Alive	Alive	Alive
PCLI	Alive	Alive	Alive
PCLI	Alive	Alive	Alive
PCLI	Alive	Alive	Alive
OFAV	Alive	Alive	Alive

## Sheet: exp 1 raw
Location	Species	Method	Initial Size	Predation	1 Week Predation %	Status 1 month	Status 3 month	Size 3 months	Status 6 month	Predation	6 Month Predation %	Size 6 months
Reef 1 (Flamingo)	OFAV	Puck	2.192	Bite	0.277059	Unhealthy	Healthy	2.831	Unhealthy	.	0	3.897
Reef 1 (Flamingo)	OFAV	Puck	2.899	Bite	0.152076	Unhealthy	Healthy	2.709	Unhealthy	.	0	3.215
Reef 2 (Kpeebs)	PCLI	Puck	7.012	Bite	0.0436872	Unhealthy	Unhealthy	6.127	Unhealthy	.	0	7.345
Reef 1 (Flamingo)	OFAV	Puck	7.686	Bite	0.0368346	Healthy	Healthy	5.583	Unhealthy	.	0	4.511
Reef 3 (MB NOAA)	OFAV	Puck	2.718	.	0	Healthy	Healthy	4.452	Unhealthy	.	0	6.071
Reef 3 (MB NOAA)	OFAV	Puck	2.922	.	0	Healthy			Unhealthy	.	0	3.792
Reef 2 (Kpeebs)	OFAV	Puck	2.983	.	0	Healthy	Healthy	6.633	Unhealthy	.	0	1.631
Reef 1 (Flamingo)	OFAV	Puck	2.998	.	0	Healthy	Healthy	3.098	Unhealthy	.	0	4.863
Reef 3 (MB NOAA)	OFAV	Puck	3.351	.	0	Healthy	Unhealthy	6.58	Unhealthy	.	0	6.215
Reef 2 (Kpeebs)	OFAV	Puck	3.369	.	0	Healthy	Healthy	4.274	Unhealthy	.	0	5.111
Reef 3 (MB NOAA)	PCLI	Puck	3.474	.	0	Healthy			Unhealthy	.	0	7.55
Reef 3 (MB NOAA)	OFAV	Puck	3.838	.	0	Healthy	Healthy	6.312	Unhealthy	.	0	4.85
Reef 3 (MB NOAA)	MCAV	Puck	3.875	.	0	Healthy	Healthy	4.699	Unhealthy	.	0	3.941
Reef 3 (MB NOAA)	OFAV	Puck	3.965	.	0	Healthy			Unhealthy	.	0	3.669
Reef 1 (Flamingo)	PSTR	Puck	4.235	.	0	Healthy	Healthy	3.688	Unhealthy	.	0	2.863
Reef 1 (Flamingo)	PCLI	Puck	4.335	.	0	Healthy	Healthy	4.9	Unhealthy	.	0	.
Reef 3 (MB NOAA)	OFAV	Puck	4.695	.	0	Healthy	Healthy	8.124	Unhealthy	.	0	8.412
Reef 3 (MB NOAA)	OFAV	Puck	4.714	.	0	Healthy	Healthy	7.606	Unhealthy	.	0	7.765
Reef 2 (Kpeebs)	OFAV	Puck	4.744	.	0	Healthy	Healthy	7.518	Unhealthy	.	0	4.276
Reef 1 (Flamingo)	PCLI	Puck	4.926	.	0	Healthy	Healthy	3.156	Unhealthy	.	0	1.739
Reef 3 (MB NOAA)	OFAV	Puck	5.706	.	0	Healthy	Healthy	6.171	Unhealthy	.	0	9.808
Reef 1 (Flamingo)	PCLI	Puck	4.37	.	0	Healthy	Healthy	3.997	Unhealthy	.	0	4.208
Reef 1 (Flamingo)	PCLI	Puck	2.392	.	0	Unhealthy	Unhealthy	3.428	Unhealthy	.	0	5.867
Reef 1 (Flamingo)	PCLI	Puck	2.732	.	0	Unhealthy	Unhealthy	2.161	Unhealthy	Bite	0.230602	3.748
Reef 1 (Flamingo)	PCLI	Puck	3.954	.	0	Unhealthy	Unhealthy	3.242	Unhealthy	.	0	5.135
Reef 2 (Kpeebs)	MCAV	Puck	5.649	.	0	Unhealthy	Healthy	4.033	Unhealthy	.	0	3.214
Reef 2 (Kpeebs)	PCLI	Puck	7.593	.	0	Unhealthy	Healthy	10.827	Unhealthy	.	0	1.162
Reef 1 (Flamingo)	MCAV	Puck	3.068	.	0	Unhealthy			Unhealthy	.	0	4.112
Reef 2 (Kpeebs)	OFAV	Puck	3.171	.	0	Unhealthy	Unhealthy	4.688	Unhealthy	.	0	4.609
Reef 1 (Flamingo)	OFAV	Puck	3.224	.	0	Unhealthy	Unhealthy	2.939	Unhealthy	.	0	2.899
Reef 1 (Flamingo)	PCLI	Puck	3.51	.	0	Unhealthy	Unhealthy	4.415	Unhealthy	.	0	7.166
Reef 1 (Flamingo)	MCAV	Puck	3.9	.	0	Unhealthy			Unhealthy	.	0	4.866
Reef 2 (Kpeebs)	PCLI	Puck	3.904	.	0	Unhealthy			Unhealthy	.	0	2.327
Reef 3 (MB NOAA)	OFAV	Puck	3.907	.	0	Unhealthy			Unhealthy	.	0	4.437
Reef 1 (Flamingo)	MCAV	Puck	3.964	.	0	Unhealthy			Unhealthy	.	0	6.162
Reef 1 (Flamingo)	PCLI	Puck	3.987	.	0	Unhealthy	Unhealthy	7.695	Unhealthy	.	0	13.333
Reef 1 (Flamingo)	PCLI	Puck	4.033	.	0	Unhealthy	Unhealthy	10.001	Unhealthy	.	0	.
Reef 1 (Flamingo)	PCLI	Puck	4.036	.	0	Unhealthy	Healthy	6.114	Unhealthy	.	0	9.051
Reef 1 (Flamingo)	MCAV	Puck	4.113	.	0	Unhealthy			Unhealthy	.	0	6.61
Reef 2 (Kpeebs)	MCAV	Puck	4.468	.	0	Unhealthy	Healthy	1.606	Unhealthy	.	0	0.878
Reef 1 (Flamingo)	PCLI	Puck	4.672	.	0	Unhealthy	Unhealthy	4.026	Unhealthy	.	0	4.281
Reef 1 (Flamingo)	MCAV	Puck	4.916	.	0	Unhealthy			Unhealthy	.	0	5.6
Reef 1 (Flamingo)	PCLI	Puck	5.523	.	0	Unhealthy	Unhealthy	7.221	Unhealthy	.	0	11.062
Reef 1 (Flamingo)	PCLI	Puck	6.068	.	0	Unhealthy	Unhealthy	0.819	Unhealthy	.	0	1.293
Reef 2 (Kpeebs)	PCLI	Puck	6.08	.	0	Unhealthy			Unhealthy	.	0	8.951
Reef 2 (Kpeebs)	PCLI	Puck	6.146	.	0	Unhealthy			Unhealthy	.	0	7.36
Reef 2 (Kpeebs)	MCAV	Puck	6.186	.	0	Unhealthy	Healthy	7.736	Unhealthy	.	0	7.186
Reef 1 (Flamingo)	PSTR	Puck	6.301	.	0	Unhealthy	Healthy	4.865	Unhealthy	.	0	5.306
Reef 1 (Flamingo)	OFAV	Puck	4.496	Bite	0.207551	Healthy	Missing
Reef 2 (Kpeebs)	PSTR	Puck	7.111	Bite	0.167852	Unhealthy	Healthy	7.395
Reef 1 (Flamingo)	PSTR	Puck	1.799	Bite	0.0570606	Missing	Missing
Reef 1 (Flamingo)	OFAV	Puck	2.084	.	0	Healthy	Healthy	2.491
Reef 1 (Flamingo)	OFAV	Puck	2.475	.	0	Healthy	Missing
Reef 3 (MB NOAA)	PCLI	Puck	2.767	.	0	Healthy
Reef 1 (Flamingo)	OFAV	Puck	2.847	.	0	Healthy	Healthy	4.327
Reef 1 (Flamingo)	PSTR	Puck	7.202	.	0	Healthy	Missing
Reef 3 (MB NOAA)	MCAV	Puck	7.375	.	0	Healthy
Reef 1 (Flamingo)	OFAV	Puck	2.022	.	0	Healthy	Healthy	5.603
Reef 1 (Flamingo)	OFAV	Puck	5.511	.	0	Healthy	Missing
Reef 1 (Flamingo)	OFAV	Puck	1.589	.	0	Unhealthy	Healthy	2.831
Reef 1 (Flamingo)	OFAV	Puck	3.456	.	0	Unhealthy	Missing
Reef 1 (Flamingo)	PSTR	Puck	1.929	.	0	Unhealthy	Unhealthy	8.262
Reef 2 (Kpeebs)	OFAV	Puck	2.614	.	0	Unhealthy	Healthy	2.099
Reef 2 (Kpeebs)	PCLI	Puck	5.122	.	0	Unhealthy
Reef 2 (Kpeebs)	PCLI	Puck	9.174	.	0	Unhealthy
Reef 1 (Flamingo)	OFAV	Puck	4.42	Bite	0.402684	Unhealthy	Healthy	5.195	Healthy	.	0	3.467
Reef 2 (Kpeebs)	PSTR	Puck	1.739	Bite	0.20874	Unhealthy	Unhealthy		Healthy	.	0	13.34
Reef 2 (Kpeebs)	PCLI	Puck	5.361	Bite	0.194829	Unhealthy	Unhealthy	6.553	Healthy	.	0	10.147
Reef 1 (Flamingo)	OFAV	Puck	2.805	Bite	0.171787	Unhealthy	Healthy	2.873	Healthy	.	0	4.787
Reef 1 (Flamingo)	OFAV	Puck	3.06	Bite	0.1089	Unhealthy	Healthy	2.831	Healthy	.	0	3.213
Reef 1 (Flamingo)	OFAV	Puck	4.378	Bite	0.0570606	Healthy	Healthy	4.93	Healthy	.	0	6.769
Reef 1 (Flamingo)	PCLI	Puck	9.3	Bite	0.042663	Healthy	Healthy	9.838	Healthy	.	0	11.187
Reef 1 (Flamingo)	MCAV	Puck	1.974	.	0	Healthy			Healthy	.	0	5.261
Reef 1 (Flamingo)	OFAV	Puck	2.035	.	0	Healthy	Healthy	3.529	Healthy	.	0	5.401
Reef 2 (Kpeebs)	OFAV	Puck	2.23	.	0	Healthy	Unhealthy	4.367	Healthy	.	0	5.371
Reef 1 (Flamingo)	MCAV	Puck	2.446	.	0	Healthy			Healthy	.	0	4.974
Reef 2 (Kpeebs)	OFAV	Puck	2.634	.	0	Healthy	Healthy	5.555	Healthy	.	0	3.817
Reef 1 (Flamingo)	MCAV	Puck	2.984	.	0	Healthy			Healthy	.	0	5.992
Reef 3 (MB NOAA)	MCAV	Puck	3.025	.	0	Healthy	Healthy	5.602	Healthy	.	0	7.157
Reef 1 (Flamingo)	MCAV	Puck	3.321	.	0	Healthy			Healthy	.	0	5.446
Reef 1 (Flamingo)	OFAV	Puck	3.472	.	0	Healthy	Healthy	3.75	Healthy	.	0	5.029
Reef 1 (Flamingo)	OFAV	Puck	3.507	.	0	Healthy	Healthy	5.355	Healthy	.	0	6.656
Reef 1 (Flamingo)	OFAV	Puck	3.517	.	0	Healthy	Unhealthy	6.003	Healthy	Bite	0.0349044	9.314
Reef 3 (MB NOAA)	OFAV	Puck	3.537	.	0	Healthy			Healthy	.	0	3.474
Reef 2 (Kpeebs)	PCLI	Puck	3.622	.	0	Healthy			Healthy	.	0	10.999
Reef 3 (MB NOAA)	PCLI	Puck	3.671	.	0	Healthy	Healthy	5.523	Healthy	.	0	8.999
Reef 2 (Kpeebs)	OFAV	Puck	3.677	.	0	Healthy	Healthy	7.816	Healthy	.	0	5.119
Reef 2 (Kpeebs)	OFAV	Puck	3.929	.	0	Healthy	Healthy	8.392	Healthy	.	0	11.293
Reef 1 (Flamingo)	OFAV	Puck	4.084	.	0	Healthy	Healthy	3.752	Healthy	.	0	4.943
Reef 1 (Flamingo)	MCAV	Puck	4.162	.	0	Healthy			Healthy	.	0	5.19
Reef 1 (Flamingo)	PCLI	Puck	4.217	.	0	Healthy	Healthy	3.465	Healthy	.	0	5.299
Reef 3 (MB NOAA)	MCAV	Puck	4.249	.	0	Healthy	Healthy	5.223	Healthy	.	0	10.417
Reef 1 (Flamingo)	OFAV	Puck	4.283	.	0	Healthy	Healthy	3.609	Healthy	.	0	4.358
Reef 2 (Kpeebs)	PCLI	Puck	4.322	.	0	Healthy			Healthy	.	0	10.563
Reef 1 (Flamingo)	MCAV	Puck	4.358	.	0	Healthy			Healthy	.	0	6.755
Reef 1 (Flamingo)	MCAV	Puck	4.404	.	0	Healthy			Healthy	.	0	8.649
Reef 3 (MB NOAA)	PCLI	Puck	4.445	.	0	Healthy	Healthy	6.252	Healthy	.	0	7.45
Reef 1 (Flamingo)	MCAV	Puck	4.464	.	0	Healthy			Healthy	.	0	7.135
Reef 1 (Flamingo)	PCLI	Puck	4.494	.	0	Healthy	Healthy	6.348	Healthy	.	0	7.642
Reef 1 (Flamingo)	PSTR	Puck	4.515	.	0	Healthy	Healthy	4.524	Healthy	.	0	4.789
Reef 1 (Flamingo)	MCAV	Puck	4.615	.	0	Healthy			Healthy	.	0	5.555
Reef 3 (MB NOAA)	PCLI	Puck	4.696	.	0	Healthy	Healthy	7.394	Healthy	.	0	6.058
Reef 1 (Flamingo)	MCAV	Puck	4.746	.	0	Healthy			Healthy	.	0	6.887
Reef 3 (MB NOAA)	PSTR	Puck	4.78	.	0	Healthy			Healthy	.	0	8.242
Reef 1 (Flamingo)	PCLI	Puck	4.824	.	0	Healthy	Healthy	3.732	Healthy	.	0	5.279
Reef 3 (MB NOAA)	OFAV	Puck	4.834	.	0	Healthy	Healthy	7.99	Healthy	.	0	7.626
Reef 1 (Flamingo)	MCAV	Puck	4.871	.	0	Healthy			Healthy	.	0	7.045
Reef 1 (Flamingo)	OFAV	Puck	4.998	.	0	Healthy	Healthy	5.849	Healthy	.	0	8.013
Reef 3 (MB NOAA)	MCAV	Puck	5.089	.	0	Healthy	Healthy	5.043	Healthy	.	0	6.895
Reef 1 (Flamingo)	MCAV	Puck	5.122	.	0	Healthy			Healthy	.	0	4.336
Reef 2 (Kpeebs)	PCLI	Puck	5.125	.	0	Healthy	Healthy	14.84	Healthy	.	0	24.871
Reef 3 (MB NOAA)	PSTR	Puck	5.179	.	0	Healthy	Healthy	6.273	Healthy	.	0	8.45
Reef 3 (MB NOAA)	PSTR	Puck	5.188	.	0	Healthy	Healthy	7.339	Healthy	.	0	7.885
Reef 1 (Flamingo)	MCAV	Puck	5.279	.	0	Healthy			Healthy	.	0	6.609
Reef 1 (Flamingo)	MCAV	Puck	5.31	.	0	Healthy			Healthy	.	0	7.543
Reef 1 (Flamingo)	MCAV	Puck	5.327	.	0	Healthy			Healthy	.	0	8.963
Reef 1 (Flamingo)	MCAV	Puck	5.372	.	0	Healthy			Healthy	.	0	6.803
Reef 2 (Kpeebs)	OFAV	Puck	5.419	.	0	Healthy	Healthy	8.559	Healthy	.	0	6.461
Reef 3 (MB NOAA)	PCLI	Puck	5.443	.	0	Healthy	Healthy	7.534	Healthy	.	0	9.181
Reef 1 (Flamingo)	OFAV	Puck	5.455	.	0	Healthy	Healthy	4.329	Healthy	.	0	4.513
Reef 1 (Flamingo)	OFAV	Puck	5.486	.	0	Healthy	Healthy	5.088	Healthy	.	0	8.428
Reef 3 (MB NOAA)	PCLI	Puck	5.543	.	0	Healthy			Healthy	.	0	10.55
Reef 3 (MB NOAA)	MCAV	Puck	5.549	.	0	Healthy			Healthy	.	0	10.783
Reef 3 (MB NOAA)	MCAV	Puck	5.552	.	0	Healthy			Healthy	.	0	11.699
Reef 1 (Flamingo)	MCAV	Puck	5.596	.	0	Healthy			Healthy	.	0	7.913
Reef 3 (MB NOAA)	PSTR	Puck	5.681	.	0	Healthy	Healthy	8.101	Healthy	.	0	11.148
Reef 1 (Flamingo)	MCAV	Puck	5.698	.	0	Healthy			Healthy	.	0	9.663
Reef 1 (Flamingo)	MCAV	Puck	5.707	.	0	Healthy			Healthy	.	0	6.503
Reef 3 (MB NOAA)	OFAV	Puck	5.744	.	0	Healthy			Healthy	.	0	11.569
Reef 3 (MB NOAA)	MCAV	Puck	5.789	.	0	Healthy			Healthy	.	0	14.407
Reef 3 (MB NOAA)	MCAV	Puck	5.926	.	0	Healthy			Healthy	.	0	14.117
Reef 1 (Flamingo)	MCAV	Puck	5.938	.	0	Healthy			Healthy	.	0	8.027
Reef 1 (Flamingo)	MCAV	Puck	6.039	.	0	Healthy			Healthy	.	0	8.897
Reef 1 (Flamingo)	MCAV	Puck	6.146	.	0	Healthy			Healthy	.	0	12.618
Reef 2 (Kpeebs)	PCLI	Puck	6.209	.	0	Healthy			Healthy	.	0	8.033
Reef 2 (Kpeebs)	PCLI	Puck	6.73	.	0	Healthy			Healthy	.	0	3.224
Reef 3 (MB NOAA)	PCLI	Puck	6.777	.	0	Healthy			Healthy	.	0	11.088
Reef 1 (Flamingo)	OFAV	Puck	6.973	.	0	Healthy	Healthy	6.182	Healthy	.	0	7.534
Reef 3 (MB NOAA)	PSTR	Puck	6.975	.	0	Healthy	Healthy	8.749	Healthy	.	0	14.05
Reef 1 (Flamingo)	MCAV	Puck	6.999	.	0	Healthy			Healthy	.	0	6.946
Reef 1 (Flamingo)	MCAV	Puck	7.004	.	0	Healthy			Healthy	.	0	8.856
Reef 1 (Flamingo)	OFAV	Puck	7.139	.	0	Healthy	Healthy	4.714	Healthy	.	0	8.401
Reef 3 (MB NOAA)	PCLI	Puck	7.561	.	0	Healthy	Healthy	7.922	Healthy	.	0	10.216
Reef 3 (MB NOAA)	PCLI	Puck	8.929	.	0	Healthy	Healthy	11.623	Healthy	.	0	14.728
Reef 2 (Kpeebs)	OFAV	Puck	10.282	.	0	Healthy	Healthy	14.201	Healthy	.	0	23.094
Reef 2 (Kpeebs)	PCLI	Puck	10.88	.	0	Healthy	Healthy	15.65	Healthy	.	0	15.672
Reef 2 (Kpeebs)	PSTR	Puck	.	.	0	Healthy	Unhealthy		Healthy	.	0	3.838
Reef 1 (Flamingo)	OFAV	Puck	3.171	.	0	Healthy	Unhealthy	3.2	Healthy	.	0	3.805
Reef 1 (Flamingo)	PCLI	Puck	3.471	.	0	Healthy	Healthy		Healthy	.	0	6.563
Reef 1 (Flamingo)	PCLI	Puck	3.812	.	0	Healthy	Healthy	7.469	Healthy	.	0	9.871
Reef 1 (Flamingo)	PCLI	Puck	3.954	.	0	Healthy	Unhealthy	4.054	Healthy	.	0	5.376
Reef 2 (Kpeebs)	OFAV	Puck	4.081	.	0	Healthy	Healthy	6.955	Healthy	.	0	4.832
Reef 1 (Flamingo)	PSTR	Puck	5.021	.	0	Healthy	Healthy	3.38	Healthy	.	0	2.897
Reef 1 (Flamingo)	PCLI	Puck	9.681	.	0	Healthy	Healthy	7.618	Healthy	.	0	11.191
Reef 1 (Flamingo)	OFAV	Puck	2.445	.	0	Unhealthy	Healthy	2.617	Healthy	.	0	3.682
Reef 1 (Flamingo)	OFAV	Puck	3.412	.	0	Unhealthy	Healthy	3.218	Healthy	.	0	3.785
Reef 1 (Flamingo)	PCLI	Puck	3.762	.	0	Unhealthy	Healthy	3.247	Healthy	.	0	7.431
Reef 1 (Flamingo)	PCLI	Puck	2.551	.	0	Unhealthy	Unhealthy	3.407	Healthy	.	0	4.578
Reef 1 (Flamingo)	PCLI	Puck	3.087	.	0	Unhealthy	Unhealthy	6.271	Healthy	.	0	7.72
Reef 1 (Flamingo)	MCAV	Puck	5.275	.	0	Unhealthy			Healthy	.	0	8.441
Reef 1 (Flamingo)	PCLI	Puck	7.415	.	0	Unhealthy	Unhealthy	7.11	Healthy	.	0	9.664
Reef 1 (Flamingo)	PCLI	Puck	8.118	.	0	Unhealthy	Unhealthy	8.068	Healthy	.	0	10.749
Reef 2 (Kpeebs)	PCLI	Puck	11.624	.	0	Unhealthy	Healthy	12.518	Healthy	.	0	16.726
Reef 1 (Flamingo)	OFAV	Puck	4.73	.	0	Healthy	Healthy	4.685	Healthy	.	0	5.816
Reef 3 (MB NOAA)	MCAV	Puck	5.361	.	0	Healthy			Healthy	.	0	9.688
Reef 1 (Flamingo)	OFAV	Puck	1.189	Bite	0.509338	Unhealthy	Unhealthy	1.289
Reef 2 (Kpeebs)	OFAV	Puck	2.392	Bite	0.359031	Unhealthy	Unhealthy	1.989
Reef 1 (Flamingo)	OFAV	Puck	2.917	Bite	0.165447	Unhealthy	Unhealthy	3.482
Reef 2 (Kpeebs)	OFAV	Puck	1.317	.	0	Healthy	Unhealthy	1.508
Reef 2 (Kpeebs)	OFAV	Puck	1.784	.	0	Healthy	Healthy	2.255
Reef 2 (Kpeebs)	OFAV	Puck	2.008	.	0	Healthy	Healthy	4.788
Reef 2 (Kpeebs)	OFAV	Puck	2.227	.	0	Healthy	Healthy	5.035
Reef 2 (Kpeebs)	OFAV	Puck	2.241	.	0	Healthy	Healthy	6.332
Reef 2 (Kpeebs)	OFAV	Puck	2.247	.	0	Healthy	Healthy	6.778
Reef 2 (Kpeebs)	OFAV	Puck	2.315	.	0	Healthy	Healthy	6.538
Reef 2 (Kpeebs)	OFAV	Puck	2.379	.	0	Healthy	Healthy	5.8
Reef 2 (Kpeebs)	OFAV	Puck	2.439	.	0	Healthy	Healthy	3.942
Reef 2 (Kpeebs)	OFAV	Puck	2.447	.	0	Healthy	Healthy	3.797
Reef 2 (Kpeebs)	OFAV	Puck	2.62	.	0	Healthy	Healthy	4.835
Reef 2 (Kpeebs)	OFAV	Puck	2.753	.	0	Healthy	Healthy	6.383
Reef 2 (Kpeebs)	OFAV	Puck	2.873	.	0	Healthy	Healthy	6.441
Reef 2 (Kpeebs)	OFAV	Puck	3.143	.	0	Healthy	Healthy	6.402
Reef 1 (Flamingo)	OFAV	Puck	3.163	.	0	Healthy	Healthy	5.085
Reef 2 (Kpeebs)	OFAV	Puck	3.254	.	0	Healthy	Healthy	6.239
Reef 2 (Kpeebs)	OFAV	Puck	3.507	.	0	Healthy	Unhealthy	5.434
Reef 2 (Kpeebs)	OFAV	Puck	3.594	.	0	Healthy	Healthy	5.114
Reef 1 (Flamingo)	PSTR	Puck	3.638	.	0	Healthy	Healthy	2.281
Reef 2 (Kpeebs)	OFAV	Puck	3.692	.	0	Healthy	Unhealthy	2.576
Reef 2 (Kpeebs)	OFAV	Puck	3.742	.	0	Healthy	Healthy	5.335
Reef 3 (MB NOAA)	OFAV	Puck	3.769	.	0	Healthy	Missing
Reef 2 (Kpeebs)	OFAV	Puck	3.924	.	0	Healthy	Healthy	9.245
Reef 2 (Kpeebs)	OFAV	Puck	4.29	.	0	Healthy	Unhealthy	4.559
Reef 2 (Kpeebs)	OFAV	Puck	4.517	.	0	Healthy	Healthy	6.554
Reef 2 (Kpeebs)	OFAV	Puck	4.637	.	0	Healthy	Healthy	6.764
Reef 2 (Kpeebs)	OFAV	Puck	4.846	.	0	Healthy	Healthy	8.073
Reef 2 (Kpeebs)	OFAV	Puck	4.967	.	0	Healthy	Healthy	5.18
Reef 2 (Kpeebs)	OFAV	Puck	5.744	.	0	Healthy	Healthy	9.004
Reef 2 (Kpeebs)	PCLI	Puck	7.02	.	0	Healthy
Reef 2 (Kpeebs)	PSTR	Puck	11.124	.	0	Healthy	Healthy	9.863
Reef 2 (Kpeebs)	OFAV	Puck	2.557	.	0	Healthy	Healthy	4.074
Reef 2 (Kpeebs)	OFAV	Puck	4.279	.	0	Healthy	Healthy	5.336
Reef 2 (Kpeebs)	OFAV	Puck	4.372	.	0	Healthy	Healthy	6.152
Reef 2 (Kpeebs)	MCAV	Puck	4.153	.	0	Unhealthy	Healthy	3.229
Reef 2 (Kpeebs)	MCAV	Puck	5.137	.	0	Unhealthy	Healthy	5.799
Reef 2 (Kpeebs)	OFAV	Puck	1.041	.	0	Unhealthy	Unhealthy	2.578
Reef 2 (Kpeebs)	OFAV	Puck	2.479	.	0	Unhealthy	Unhealthy	2.305
Reef 2 (Kpeebs)	OFAV	Puck	2.736	.	0	Unhealthy	Unhealthy	2.632
Reef 3 (MB NOAA)	OFAV	Puck	3.122	.	0	Unhealthy
Reef 2 (Kpeebs)	OFAV	Puck	3.348	.	0	Unhealthy	Healthy	2.91
Reef 2 (Kpeebs)	OFAV	Puck	3.581	.	0	Unhealthy	Dead
Reef 2 (Kpeebs)	OFAV	Puck	4.112	.	0	Unhealthy	Unhealthy	1.606
Reef 2 (Kpeebs)	OFAV	Puck	4.577	.	0	Healthy	Unhealthy	4.922
Reef 2 (Kpeebs)	OFAV	Puck	1.878	.	0	Unhealthy	Healthy	4.05
Reef 1 (Flamingo)	OFAV	Puck	0.884	.	0
Reef 1 (Flamingo)	OFAV	Puck	1.444	.	0
Reef 2 (Kpeebs)	OFAV	Puck	2.752	.	0
Reef 1 (Flamingo)	PSTR	Puck	6.218	.	0
Reef 2 (Kpeebs)	PSTR	Puck	2.464	.	0
Reef 1 (Flamingo)	PCLI	Puck	2.863	.	0
Reef 2 (Kpeebs)	MCAV	Puck	4.544	.	0
Reef 2 (Kpeebs)	MCAV	Puck	6.065	.	0
Reef 2 (Kpeebs)	MCAV	Puck	6.404	.	0

## Sheet: coral cover
Reef	Plot	Mean Coral Cover
1	1	1.97
1	2	0
1	3	0.57	0.846667	1.01372
2	1	1.21
2	2	0.51
2	3	0.66	0.793333	0.368556
3	1	0.13
3	2	0
3	3	0	0.0433333	0.0750555
